# Supplementary material
Source: publisher site journal article supplement (https://www.dovepress.com/article/452017)
Supplement: Supplementary file 1 [file get_supplementary_file.php]

**Project Introduction**

**Selection criteria**

1. fully understood this study and voluntarily signed the informed consent form
2. age ≥18 years, both males and females are eligible
3. patients who met the diagnostic criteria for insomnia disorder in the Diagnostic and Statistical Manual for Mental Disorders, 5th edition published by the American Psychiatric Association
4. with a disease duration ≥ 3 months, time of falling asleep lasting longer than 30 minutes at least 3 times per week or a subjective total sleep time ≤ 6 hours in night in the past month prior to admission
5. routine bedtime in the past three months falls between 9 PM and 1 AM the following day, and the average time spent in bed each night is ≥7 hours
6. patients who had normal cognitive level, and were able to cooperate with the researcher to complete scale assessment and PSG examination
7. undergo two consecutive nights of polysomnography (PSG) monitoring, with the mean Total Sleep Time (TST) being ≥240 minutes and ≤390 minutes
8. during PSG monitoring, the number of arousal ≥2 times or total awakening time ≥40 minutes; sleep efficiency <85%
9. patients who had an Insomnia Severity Index (ISI) score ≥ 10
10. patients who did not take sleep medications during the past month

**Exclusion criteria**

1. within 7 days prior to enrollment, the use or anticipated use of drugs that may impair the participant's alertness, cognitive function, and behavior, such as anticholinergic drugs, memory-enhancing drugs, etc.
2. requires long-term use of thyroid or corticosteroid replacement medications.
3. working across time zones or working night shifts during the past month
4. sleep affected due to a weight loss program or changes in exercise habits within 30 days prior to enrollment.
5. work-related reasons or major life changes altered the daily routine within 3 months prior to enrollment.
6. severe internal medicine diseases, such as chronic heart, brain, lung, liver, kidney, and endocrine diseases
7. previous history of epilepsy, schizophrenia, bipolar disorder, neurodevelopmental delay, and cognitive impairment
8. previous history of sleep apnea, or history of restless legs syndrome and periodic leg movements
9. PSG monitoring shows an Apnea-Hypopnea Index (AHI) >10 events/hour, or a Periodic Limb Movement Sleep Index (PLMSI) >25 events/hour
10. smoking ≥ 10 cigarettes per day, drinking ≥ 14 units of alcohol per week (1 alcohol unit is equivalent to about 350 ml of beer with 5% alcohol content, or 40 ml of hard liquor with 40% alcohol content, or 150 ml of wine with 12% alcohol content), or history of toxic exposure
11. a Hamilton Anxiety Rating(HAMA) Scale score＞14, and a Hamilton Depression Rating(HAMD) Scale score ≥ 18

**Exit criteria**

1. Participant withdraws informed consent
2. Participant has poor compliance with the study protocol
3. The researcher considers there to be other situations where the participant is unsuitable to continue in the study
